# Supplementary material
Source: PubMed Central journal article supplement (PMC6028970)
Supplement: supp_RA118.002246_135765_1_supp_134488_p8gvsn.pdf [file supp_RA118.002246_135765_1_supp_134488_p8gvsn.pdf]

## Supplementary Figures

For

### Cereblon suppresses lipopolysaccharide-induced inflammatory response through promoting the ubiquitination and degradation of c-Jun

Jing Yang<sup>#</sup>, Min Huang<sup>#</sup>, Liang Zhou, Xian He, Xiaogang Jiang, Yang Zhang, Guoqiang Xu\*

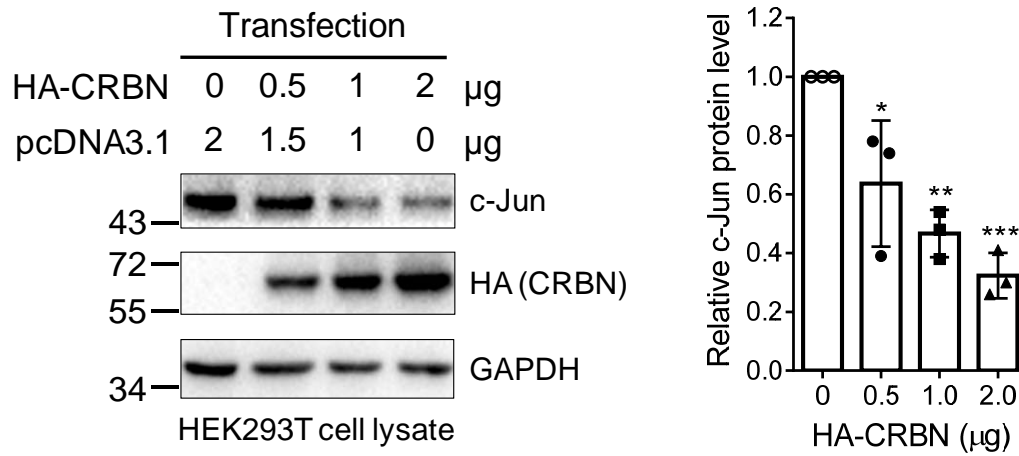

**Supplementary Figure S1. CRBN expression decreases c-Jun protein level in a dose dependent manner.** HEK293T cells were transfected with the indicated amount of pcDNA3.1 or/and HA-CRBN plasmids in 6-well plates using polyethylenimine (PEI) transfection reagent. Cells were lysed 48 h after transfection and blotted with the indicated antibodies. Three replicates were performed to obtain the mean and standard deviation (SD). Student's *t* test was used to calculate the *P*-value against the control sample. \*:  $P < 0.05$ ; \*\*:  $P < 0.01$ ; \*\*\*:  $P < 0.001$ .

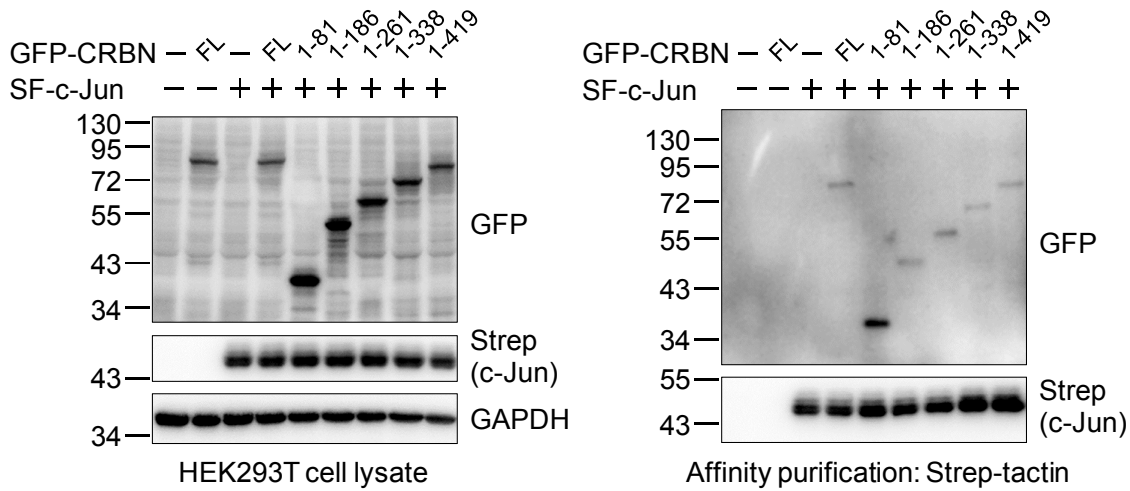

**Supplementary Figure S2. CRBN 1-81 domain interacts with c-Jun.** HEK293T cells were transfected with pcDNA3.1 or Strep-FLAG (SF)-c-Jun and GFP-CRBN full length (FL), 1-81, 1-186, 1-261, 1-338, or 1-419 domain for 48 h. Then cells were treated with MG132 (10  $\mu$ M) for 12 h to prevent protein degradation. Cell lysates were prepared and c-Jun was purified with Strep-tactin agarose beads. Immunoblotting was carried out for the cell lysates and affinity purified samples with the indicated antibodies.

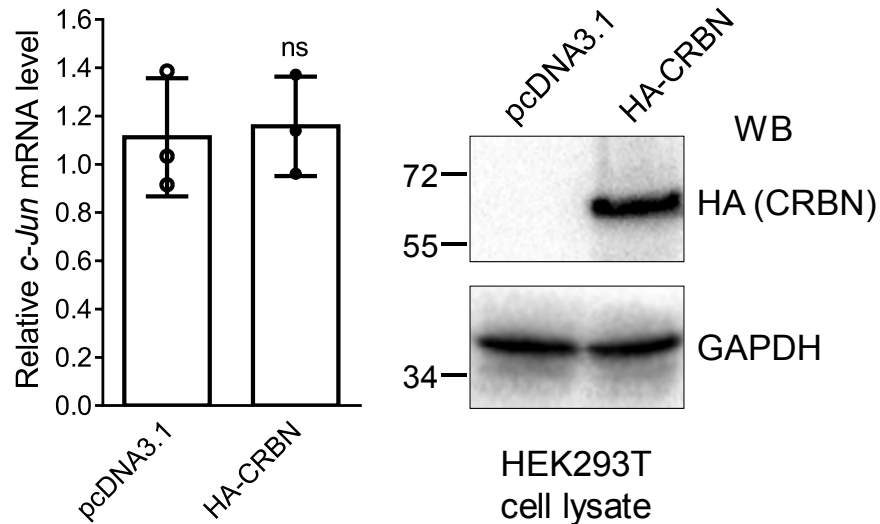

**Supplementary Figure S3. Expression of CRBN does not affect the *c-Jun* mRNA level.** HEK293T cells were transfected with pcDNA3.1 or HA-CRBN plasmid and total RNA was extracted with TRIzol reagents 48 h after transfection. qPCR was performed to measure the relative *c-Jun* mRNA level and *GAPDH* was used as a control for normalization. Three replicates were performed to obtain the mean and SD. Student's *t* test was used to calculate the *P*-value. ns: not significant. Western blotting images showed the CRBN expression. *GAPDH* was used as a control.

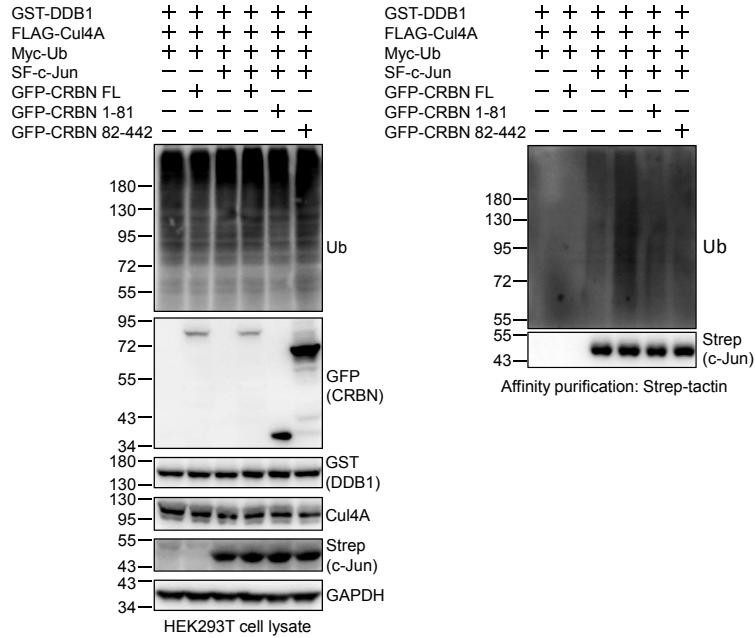

**Supplementary Figure S4. CRBN 82-442 domain does not affect the c-Jun ubiquitination.** HEK293T cells were transfected with DDB1, Cul4A, ubiquitin, SF-c-Jun, and CRBN or its truncation mutants. pcDNA3.1 was used to balance the total amount of plasmids. At 48 h post-transfection, cells were treated with MG132 (10  $\mu$ M) for 12 h. SF-c-Jun was purified with Strep-tactin agarose beads. The cell lysate and purified samples were immunoblotted with the indicated antibodies.

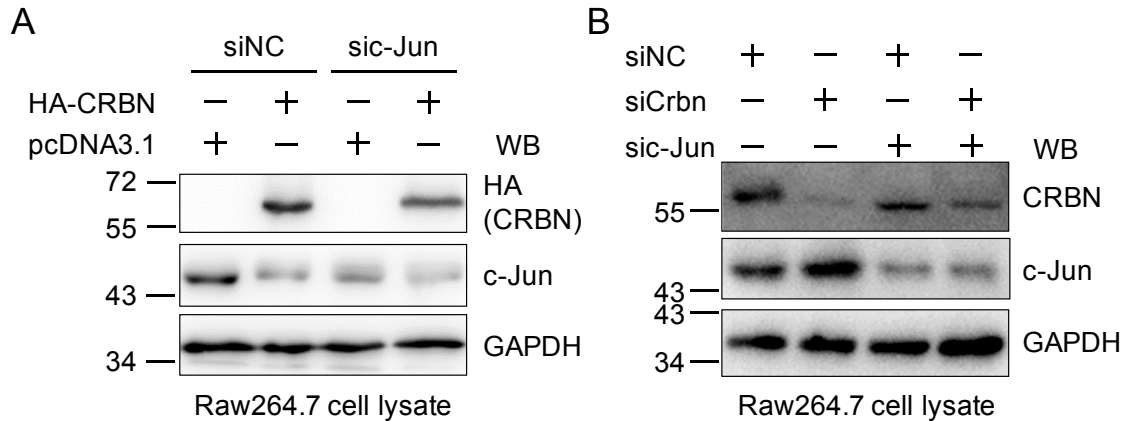

**Supplementary Figure S5. Western blotting analyses of protein expression for samples used in Figure 5.** (A) Raw264.7 cells were transfected with pcDNA3.1 or HA-CRBN and siNC or sic-Jun using lipofectamine 3000 and lysed 48 h after transfection. Cell lysates were immunoblotted with the indicated antibodies (related to Figure 5A-D). (B) Raw264.7 cells were transfected with siNC, siCRBN, and/or sic-Jun using lipofectamine 3000 and lysed 48 h after transfection. Cell lysates were blotted with the indicated antibodies (related to Figure 5E-H).
